# Supplementary material for: Baboon induced pluripotent stem cell generation by piggyBac transposition of reprogramming factors
Source: PubMed Central journal article supplement (PMC7041535; doi:10.5194/pb-6-75-2019), 2019-07-29
Supplement: pb-6-75-supplement.pdf [file pb-6-75-supplement.pdf]

Supplement of Primate Biol., 6, 75–86, 2019  
<https://doi.org/10.5194/pb-6-75-2019-supplement>  
© Author(s) 2019. This work is distributed under  
the Creative Commons Attribution 4.0 License.

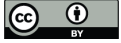

*Supplement of*

## **Baboon induced pluripotent stem cell generation by *piggyBac* transposition of reprogramming factors**

**Ignacio Rodriguez-Polo et al.**

*Correspondence to:* Rüdiger Behr (rbehr@dpz.eu)

The copyright of individual parts of the supplement might differ from the CC BY 4.0 License.

42

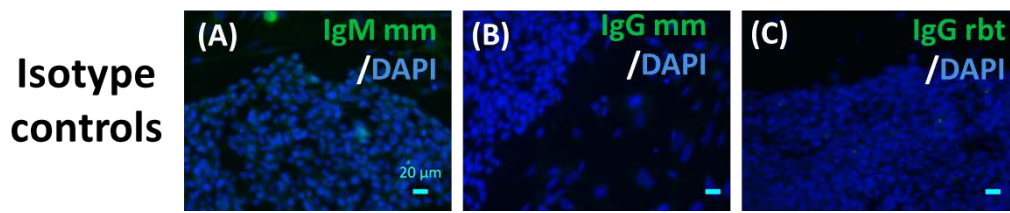

43

44 **Suppl. Figure 1: Immunofluorescence isotype control (A), (B), (C)** Isotype  
45 controls, merge images FITC+DAPI (scale bar 20μm) (A) Isotype control Mouse  
46 IgM (B) Isotype control Mouse IgG (C) Isotype control Rabbit IgG.

47

48

49

50

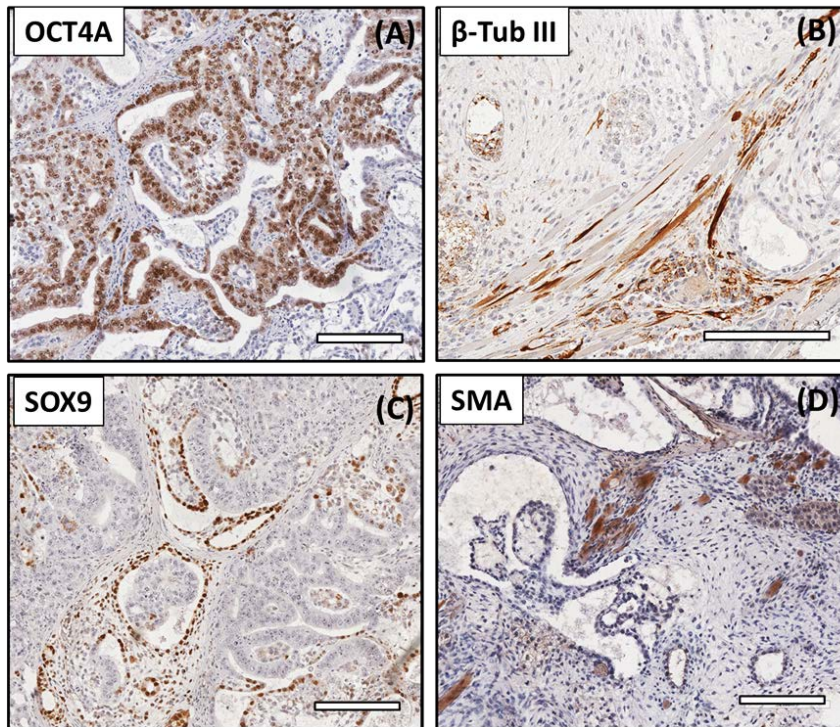

51

52 **Suppl. Figure 2: Immunohistochemical analysis of DPZ\_biPSC 5 teratoma.**  
53 Tumor tissue analyzed for the expression of SOX9,  $\beta$ -Tubulin III, and smooth  
54 muscle actin (SMA), and OCT4A. (A) Pluripotency marker OCT4A (POU5F1)  
55 staining (bars represent 200  $\mu$ m). (B) Ectodermal  $\beta$ -Tubulin 3 staining ( $\beta$ -Tub III).  
56 (C) SOX9 staining suggesting endodermal lineage differentiation. (D)  
57 Mesodermal smooth muscle actin (SMA) staining.

58

59

60

61

62
